# Supplementary material for: Genome-wide study of DNA methylation in Amyotrophic Lateral Sclerosis identifies differentially methylated loci and implicates metabolic, inflammatory and cholesterol pathways
Source: bioRxiv or medRxiv preprint supplement (doi:10.1101/2021.03.12.21253115), 2021-03-24
Supplement: Supplementary file [file media-2.pdf]

# Quality Control

Genome-wide study of DNA methylation in Amyotrophic Lateral Sclerosis identifies differentially methylated loci and implicates metabolic, inflammatory and cholesterol pathways

March 6, 2021

## Contents

|          |                                           |           |
|----------|-------------------------------------------|-----------|
| <b>1</b> | <b>MinE 450k</b>                          | <b>2</b>  |
| <b>2</b> | <b>MinE EPIC</b>                          | <b>9</b>  |
| <b>3</b> | <b>AUS1</b>                               | <b>16</b> |
| <b>4</b> | <b>AUS2</b>                               | <b>23</b> |
| <b>5</b> | <b>Definition of AUS1 and AUS2 strata</b> | <b>29</b> |

# 1 MinE 450k

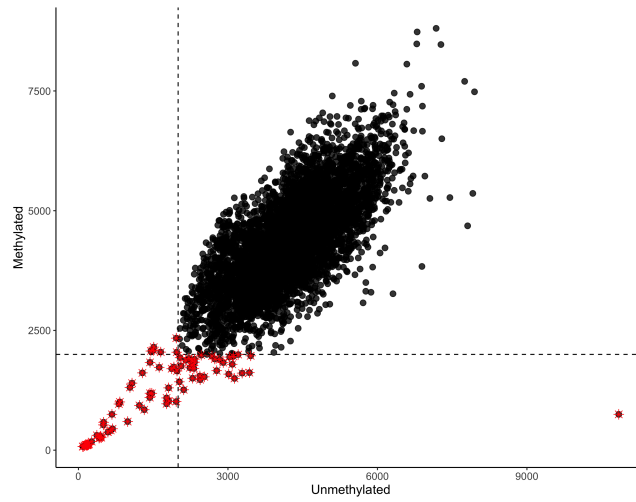

QC figure 1: Median unmethylated vs. median methylated signal.

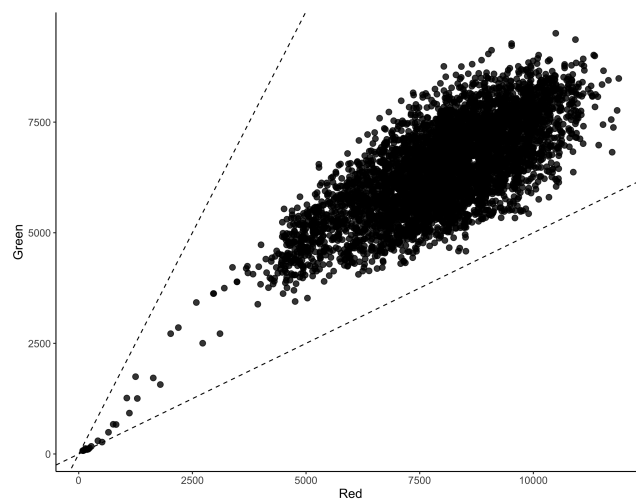

QC figure 2: Median red vs. median green signal, calculated in type I probes.

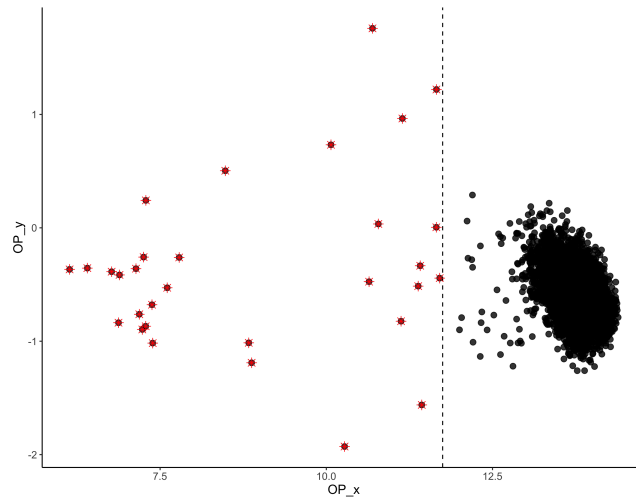

**QC figure 3:** Rotated OP (Overall quality) plot based on non-polymorphic control probes as implemented in the *MethylAid* package [1].

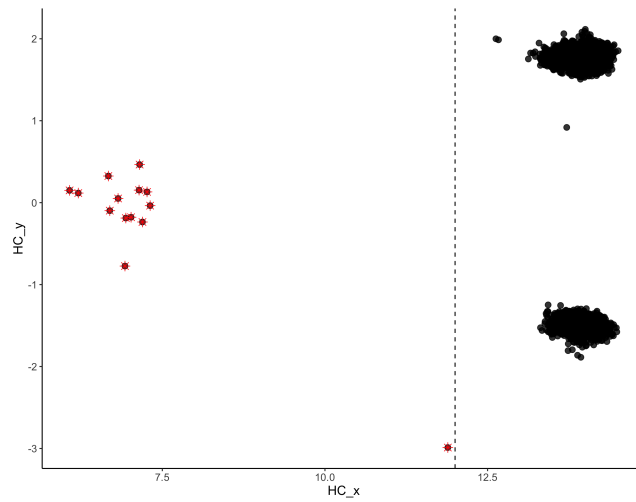

**QC figure 4:** Rotated HC plot based on hybridization control probes as implemented in the *MethylAid* package [1].

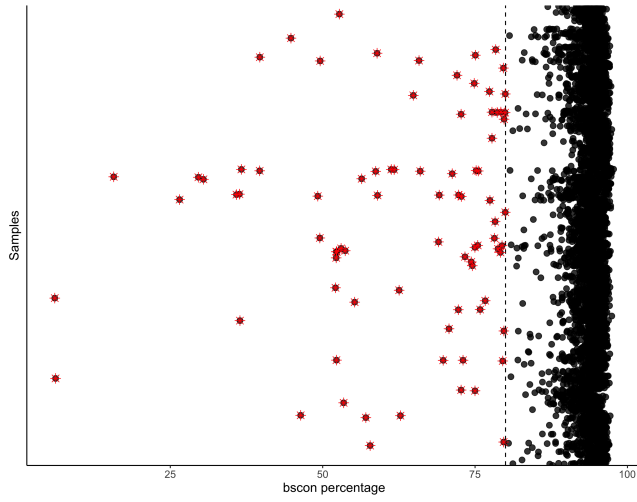

**QC figure 5:** bscon metric from the *wateRmelon* package, which measures bisulfite conversion efficiency [2].

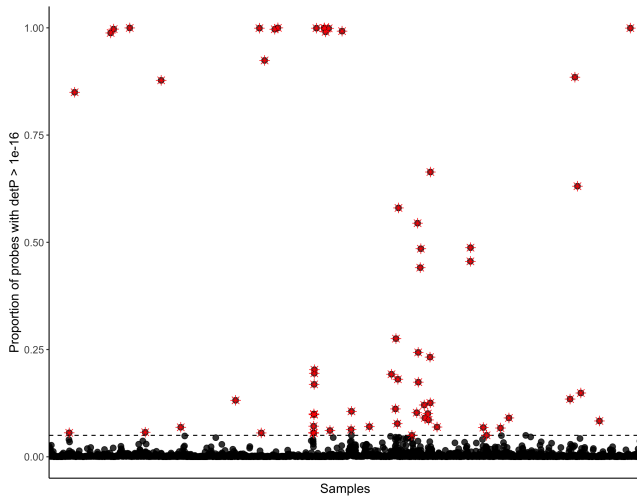

**QC figure 6:** Percentage of probes with detection P-value  $> 1 \times 10^{-16}$



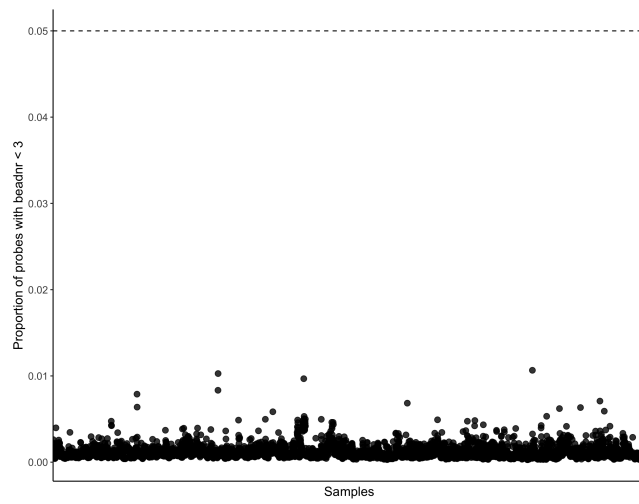

QC figure 7: Percentage of probes with beadNr < 3.

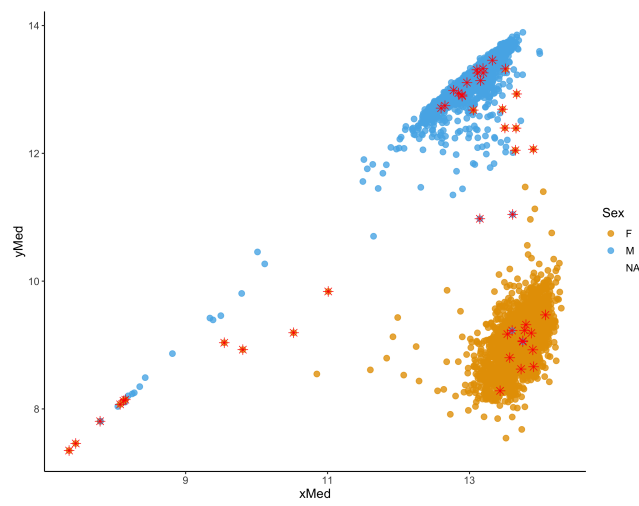

QC figure 8: Median X and Y copy number, as implemented in the *minfi* package [3].

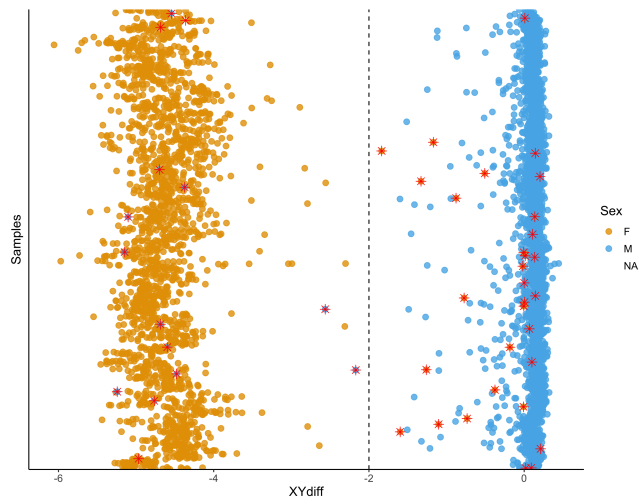

**QC figure 9:** Difference between median Y-chromosomal and median X-chromosomal signal intensity.

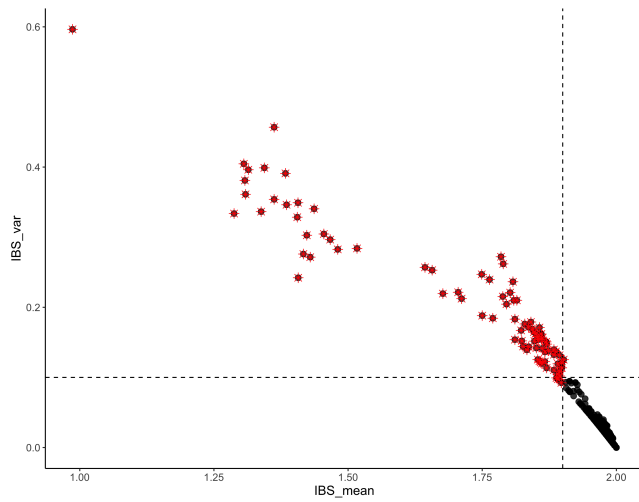

**QC figure 10:** Identity-by-descent (IBS) comparing DNAm-inferred SNPs and SNPs measured using whole-genome sequencing data.

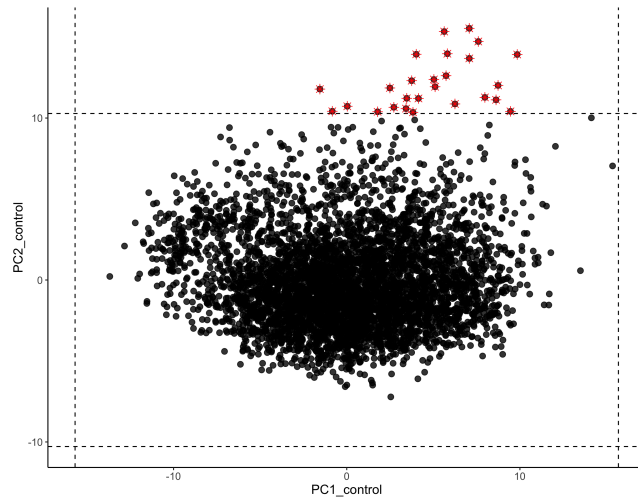

QC figure 11: Control probe principal components, after first round of QC.

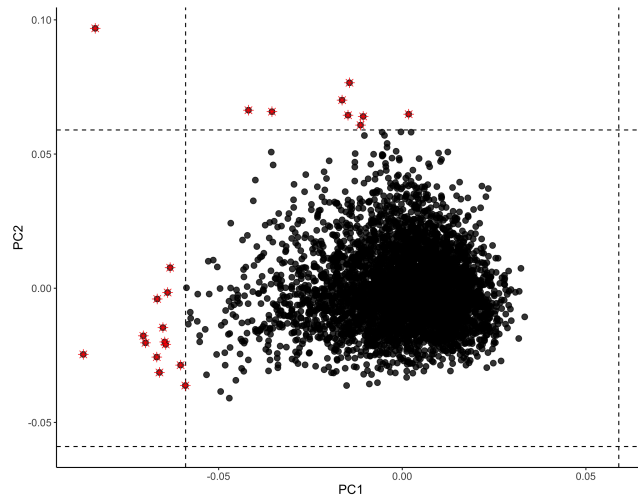

QC figure 12: Array-wide principal components, after first round of QC.

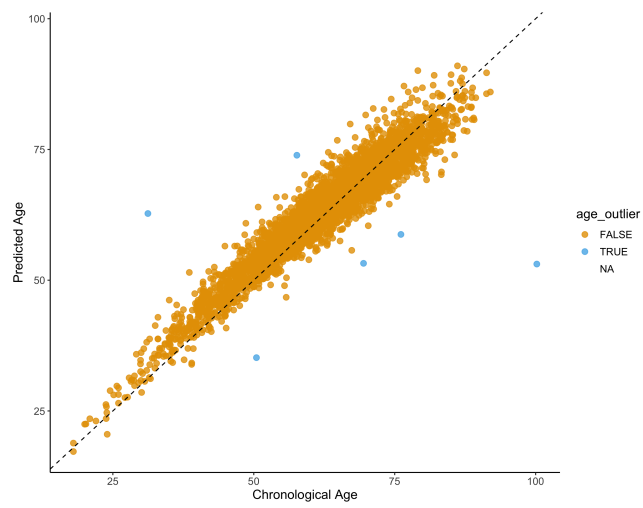

**QC figure 13:** Chronological age vs. Predicted Age based on the Zhang *et al.* age predictor [4].

## 2 MinE EPIC

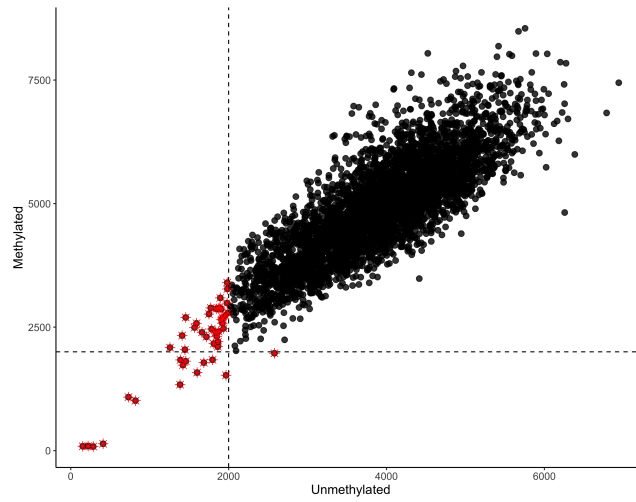

QC figure 14: Median unmethylated vs. median methylated signal.

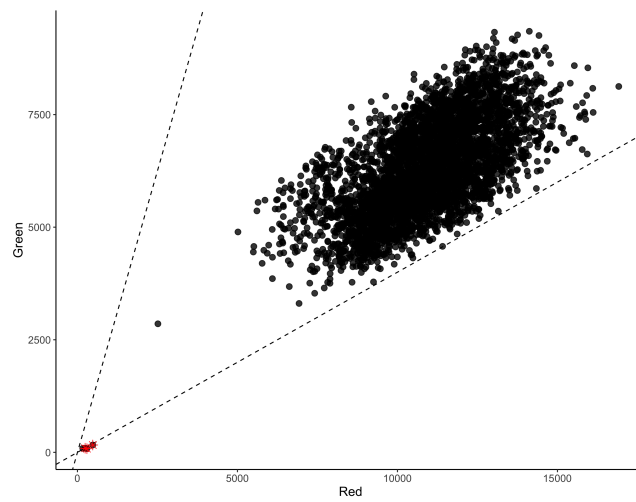

QC figure 15: Median red vs. median green signal, calculated in type I probes.

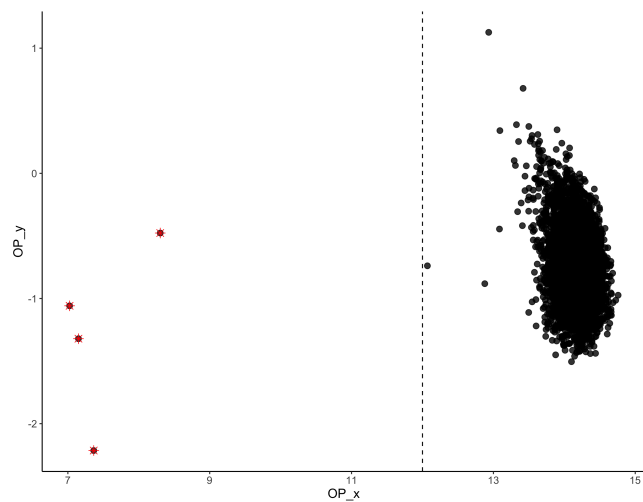

**QC figure 16:** Rotated OP (Overall quality) plot based on non-polymorphic control probes as implemented in the *MethylAid* package [1].

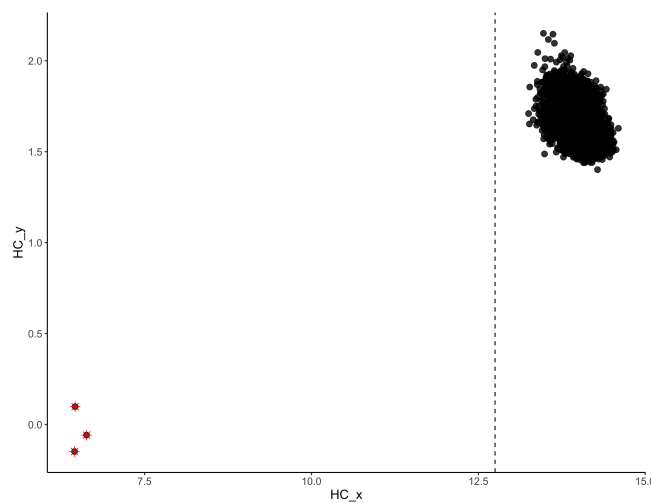

**QC figure 17:** Rotated HC plot based on hybridization control probes as implemented in the *MethylAid* package [1].

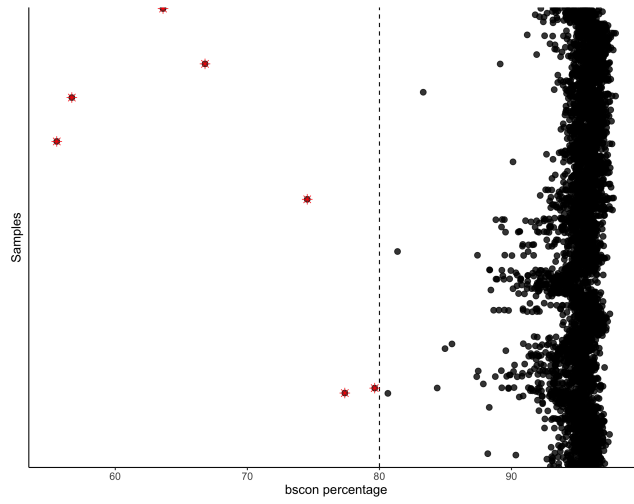

**QC figure 18:** bscon metric from the *wateRmelon* package, which measures bisulfite conversion efficiency [2].

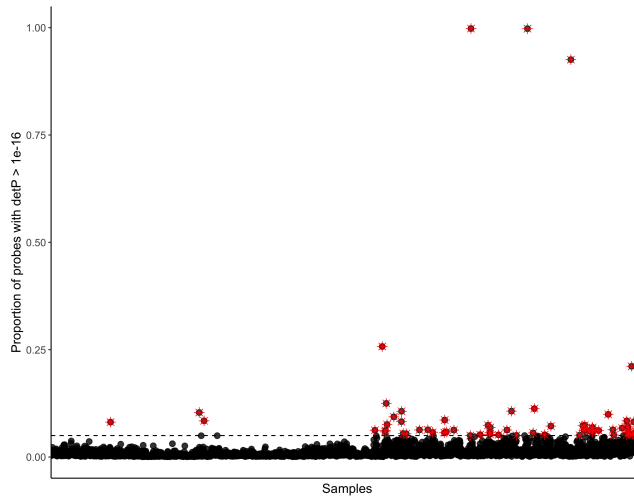

**QC figure 19:** Percentage of probes with detection P-value  $> 1 \times 10^{-16}$

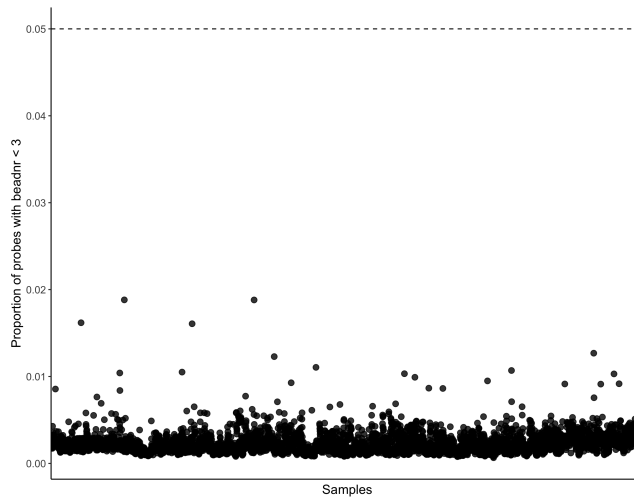

QC figure 20: Percentage of probes with beadNr < 3.

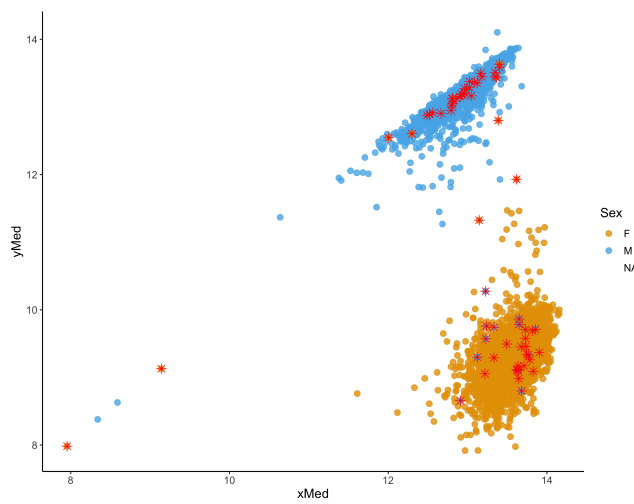

QC figure 21: Median X and Y copy number, as implemented in the *minfi* package [3].



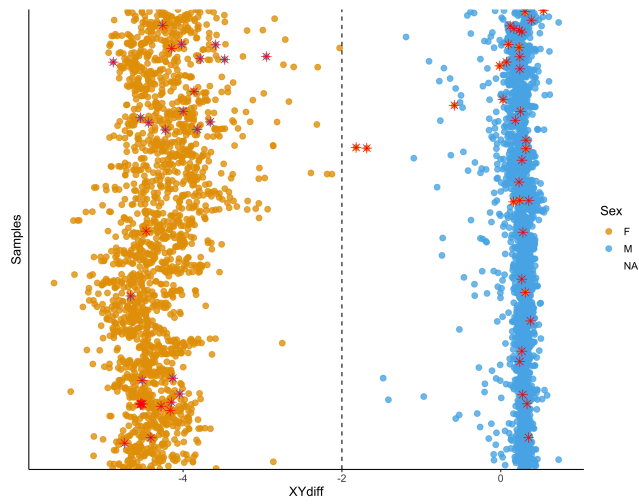

**QC figure 22:** Difference between median Y-chromosomal and median X-chromosomal signal intensity.

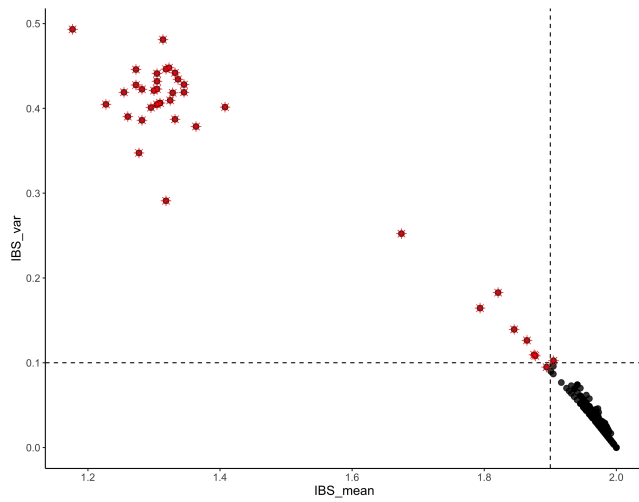

**QC figure 23:** Identity-by-descent (IBS) comparing DNAm-inferred SNPs and SNPs measured using whole-genome sequencing data.

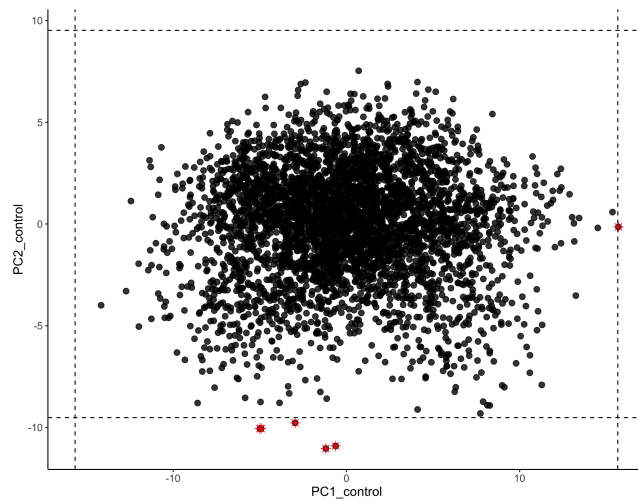

**QC figure 24:** Control probe principal components, after first round of QC.

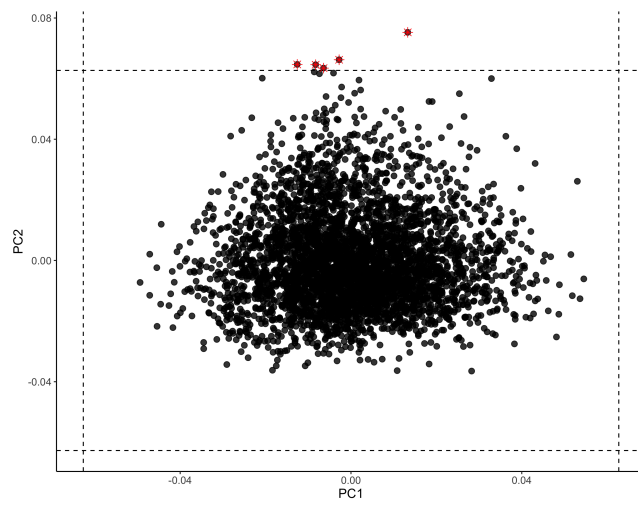

**QC figure 25:** Array-wide principal components, after first round of QC.

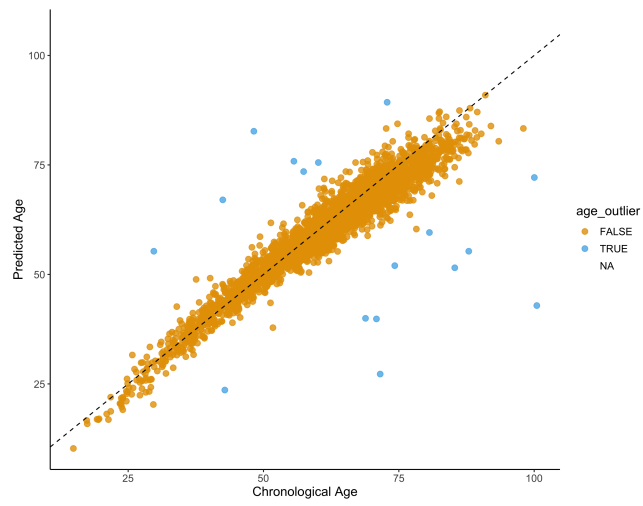

**QC figure 26:** Chronological age vs. Predicted Age based on the Zhang *et al.* age predictor [4].

### 3 AUS1

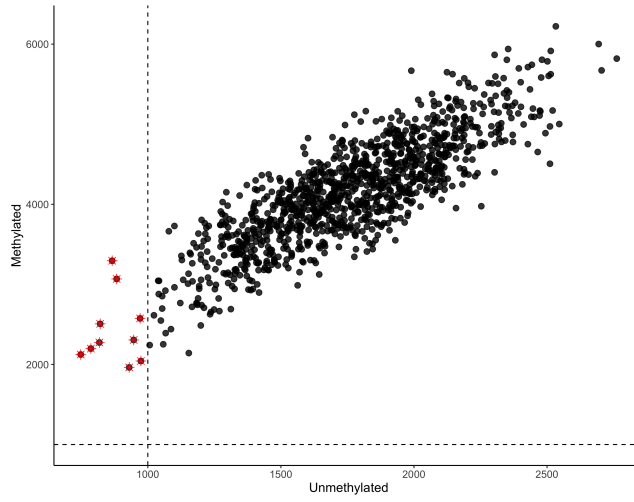

QC figure 27: Median unmethylated vs. median methylated signal.

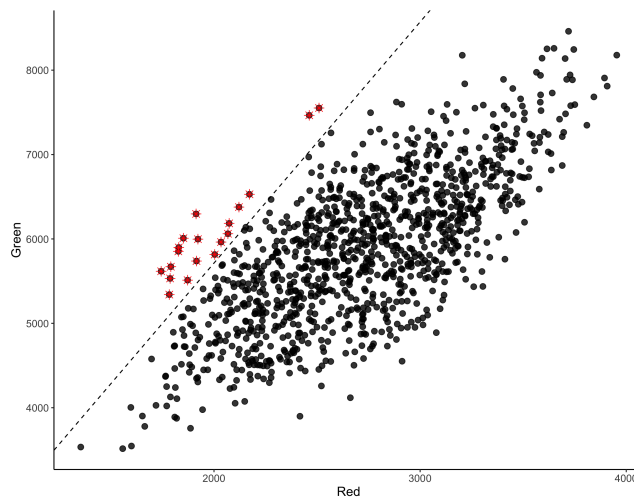

QC figure 28: Median red vs. median green signal, calculated in type I probes.

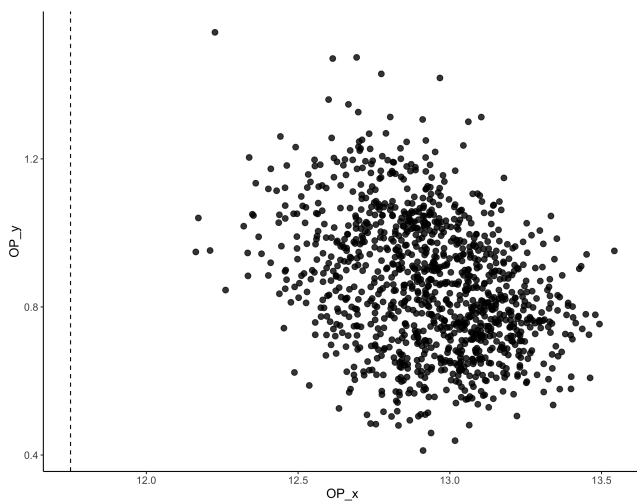

**QC figure 29:** Rotated OP (Overall quality) plot based on non-polymorphic control probes as implemented in the *MethylAid* package [1].

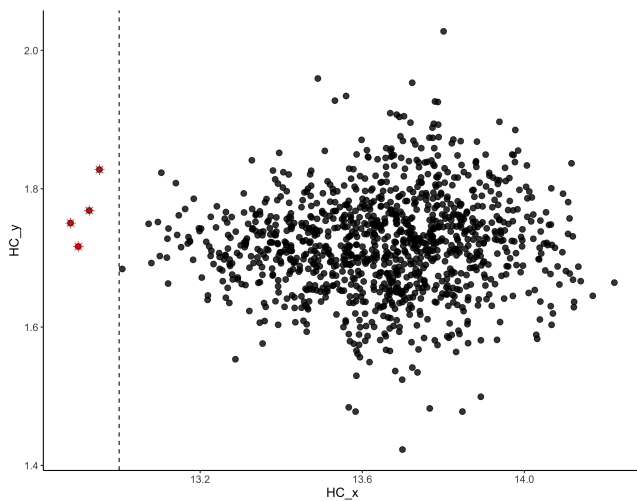

**QC figure 30:** Rotated HC plot based on hybridization control probes as implemented in the *MethylAid* package [1].

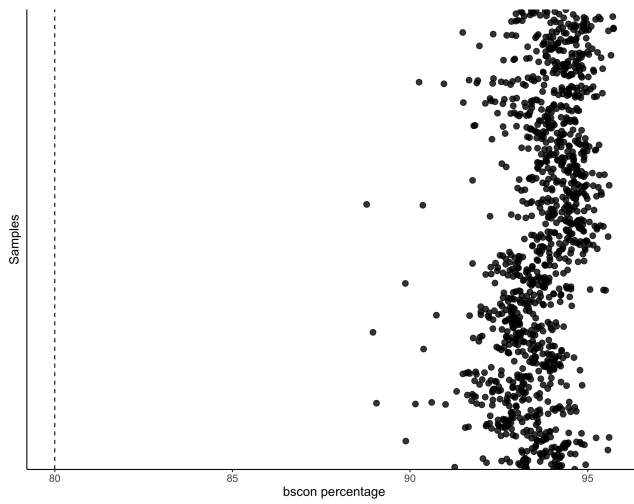

**QC figure 31:** bscon metric from the *wateRmelon* package, which measures bisulfite conversion efficiency [2].

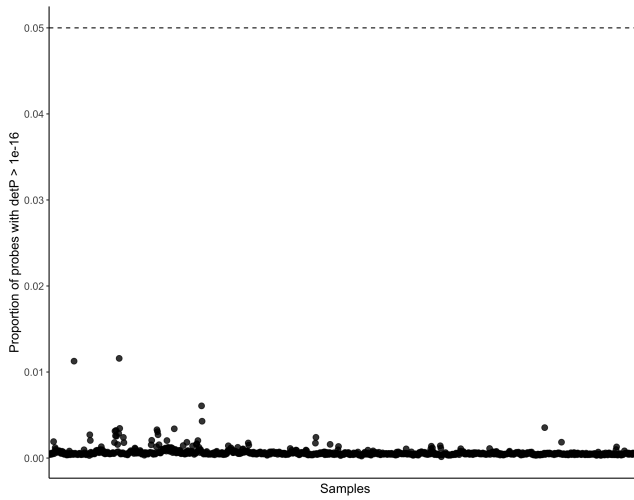

**QC figure 32:** Percentage of probes with detection P-value  $> 1 \times 10^{-16}$

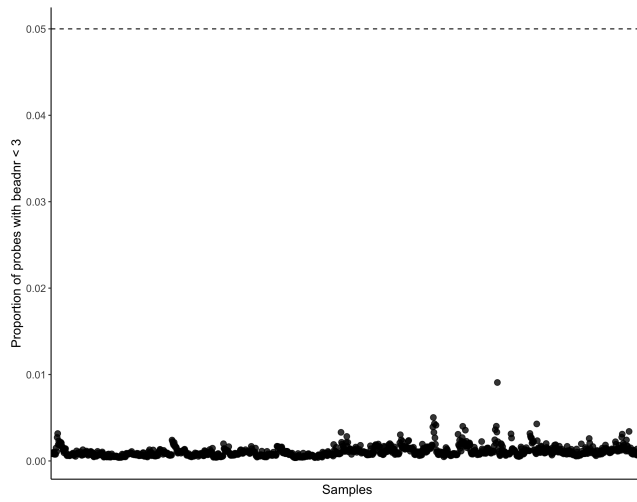

QC figure 33: Percentage of probes with beadNr < 3.

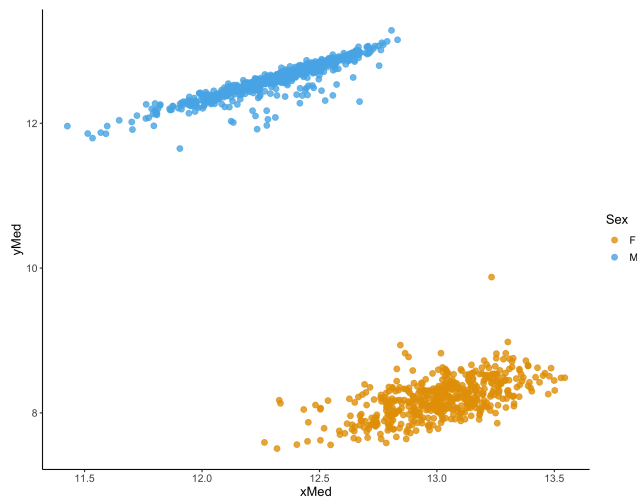

QC figure 34: Median X and Y copy number, as implemented in the *minfi* package [3].

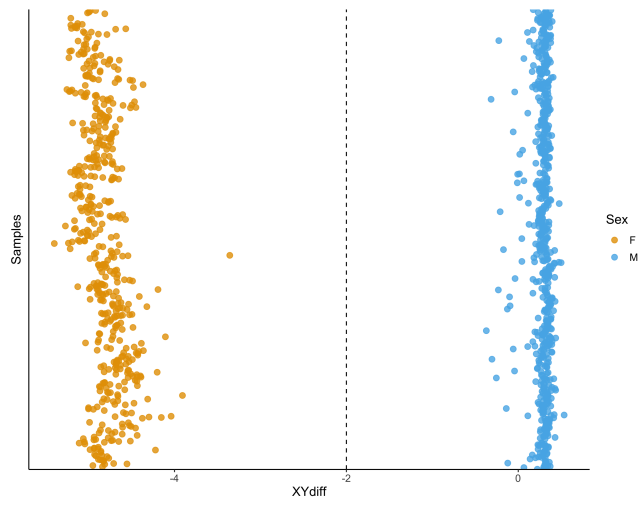

**QC figure 35:** Difference between median Y-chromosomal and median X-chromosomal signal intensity.



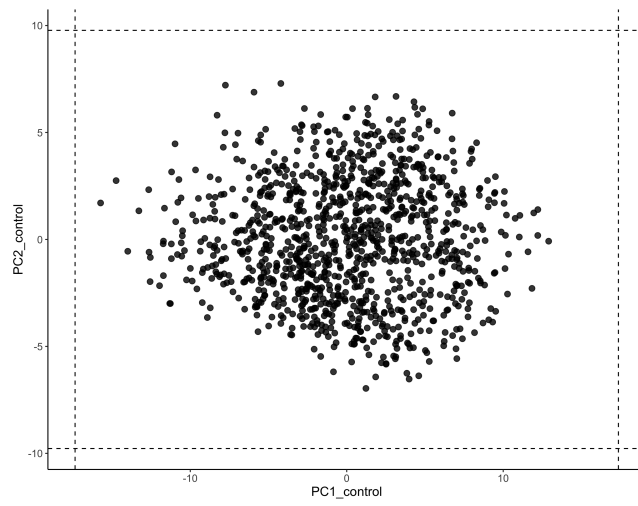

**QC figure 36:** Control probe principal components, after first round of QC.

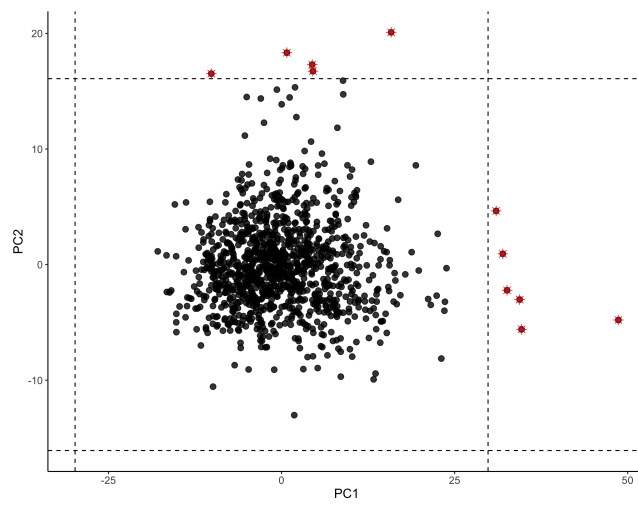

**QC figure 37:** Array-wide principal components, after first round of QC.

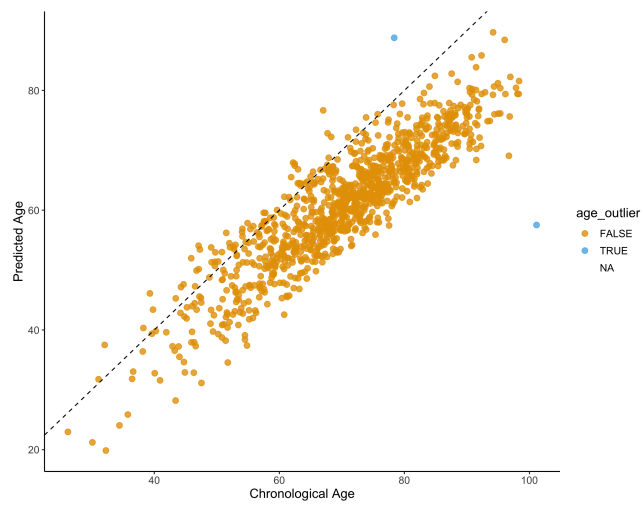

**QC figure 38:** Chronological age vs. Predicted Age based on the Zhang *et al.* age predictor [4].

## 4 AUS2

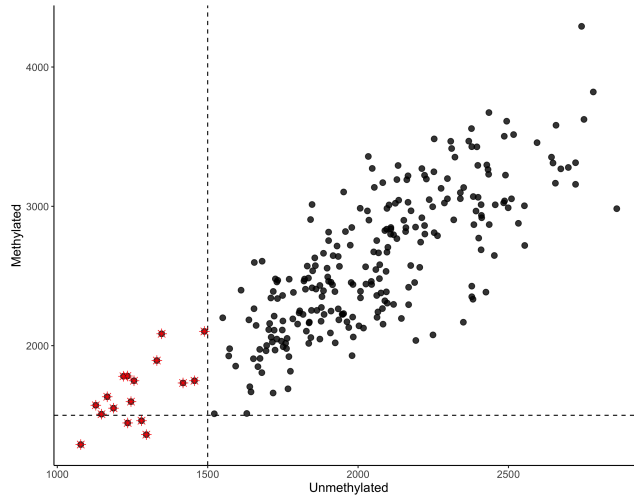

QC figure 39: Median unmethylated vs. median methylated signal.

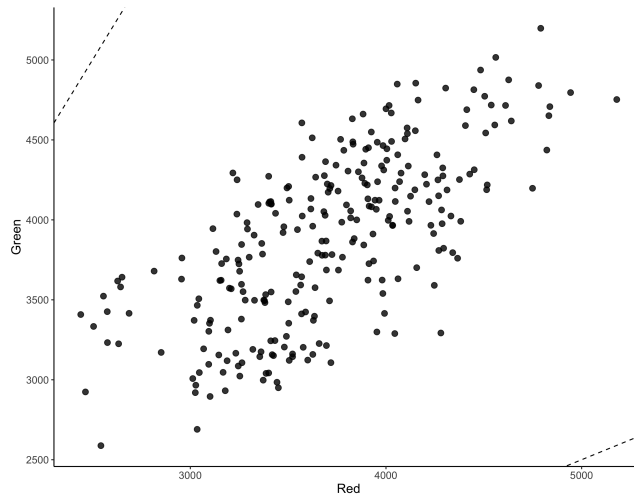

QC figure 40: Median red vs. median green signal, calculated in type I probes.

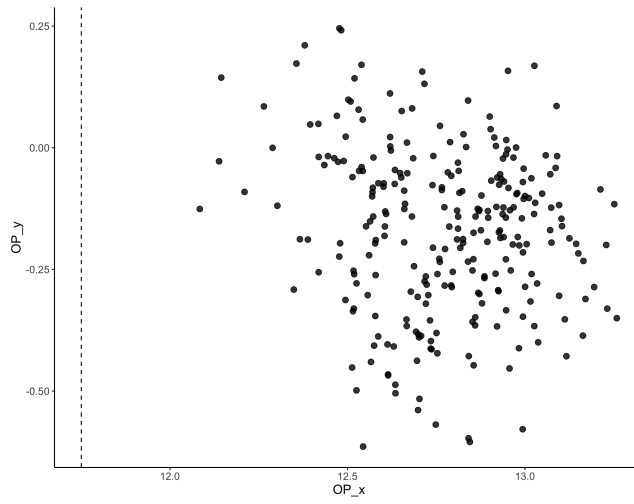

**QC figure 41:** Rotated OP (Overall quality) plot based on non-polymorphic control probes as implemented in the *MethylAid* package [1].

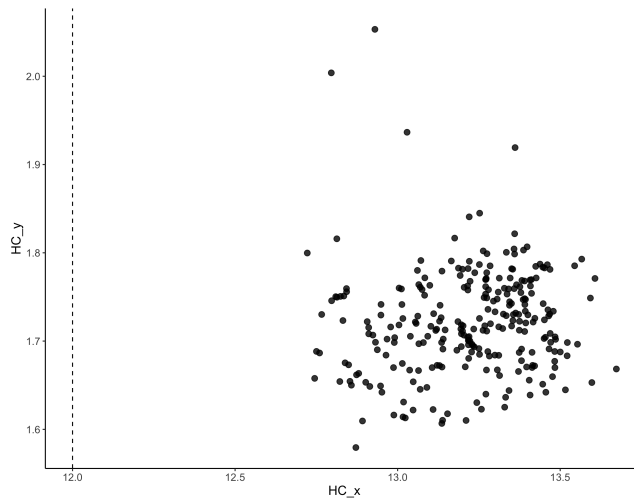

**QC figure 42:** Rotated HC plot based on hybridization control probes as implemented in the *MethylAid* package [1].

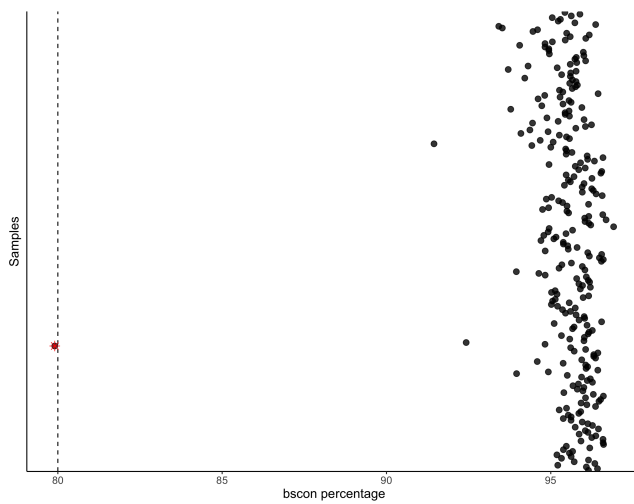

**QC figure 43:** bscon metric from the *wateRmelon* package, which measures bisulfite conversion efficiency [2].

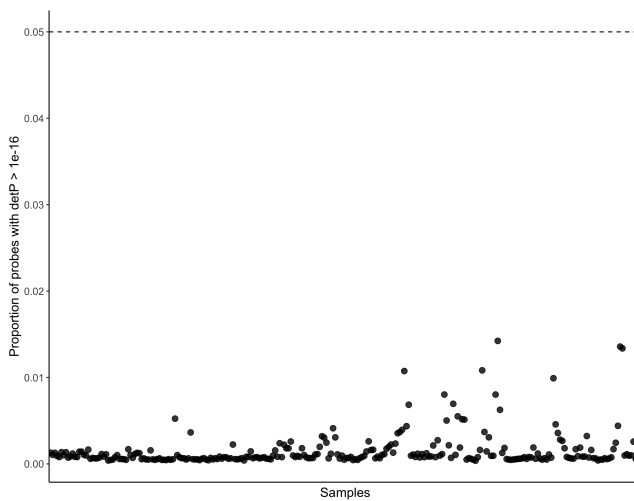

**QC figure 44:** Percentage of probes with detection P-value  $> 1 \times 10^{-16}$

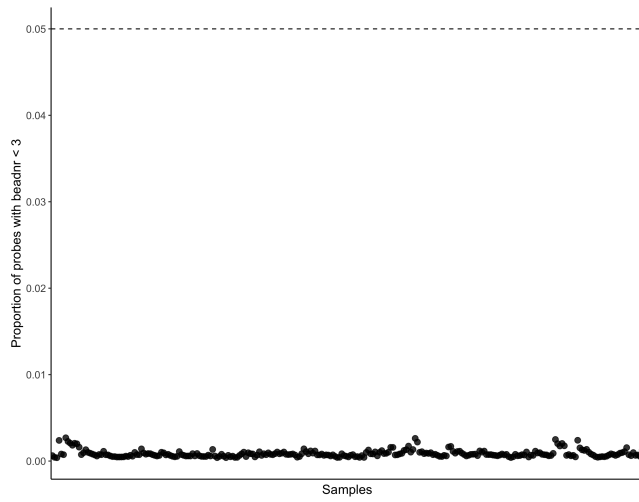

QC figure 45: Percentage of probes with beadNr < 3.

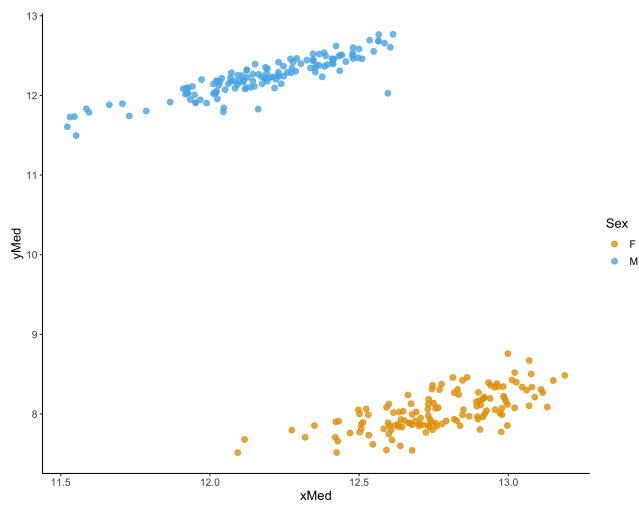

QC figure 46: Median X and Y copy number, as implemented in the *minfi* package [3].

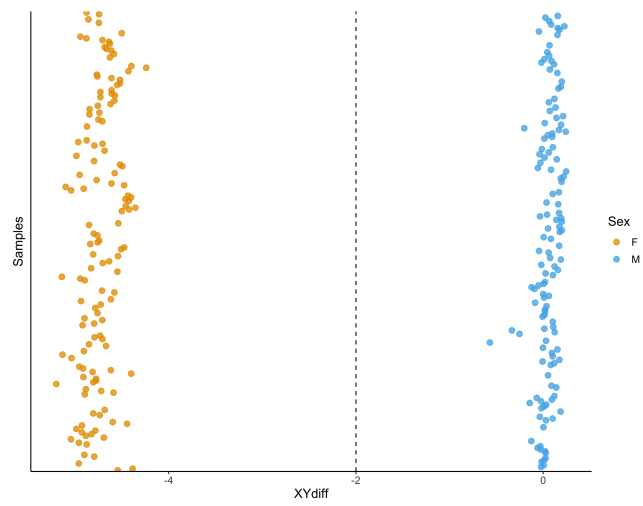

**QC figure 47:** Difference between median Y-chromosomal and median X-chromosomal signal intensity.

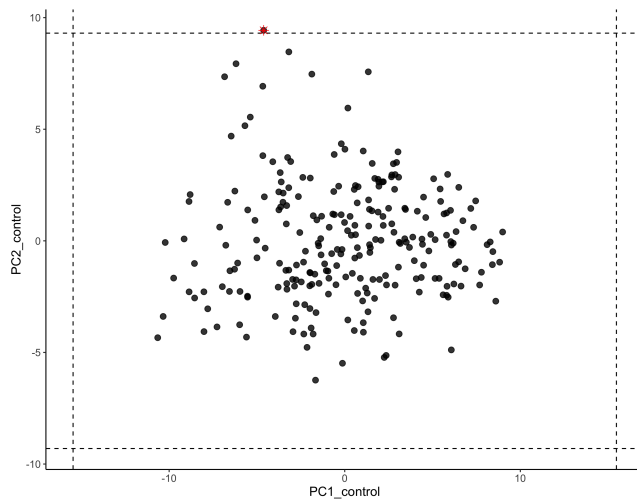

**QC figure 48:** Control probe principal components, after first round of QC.

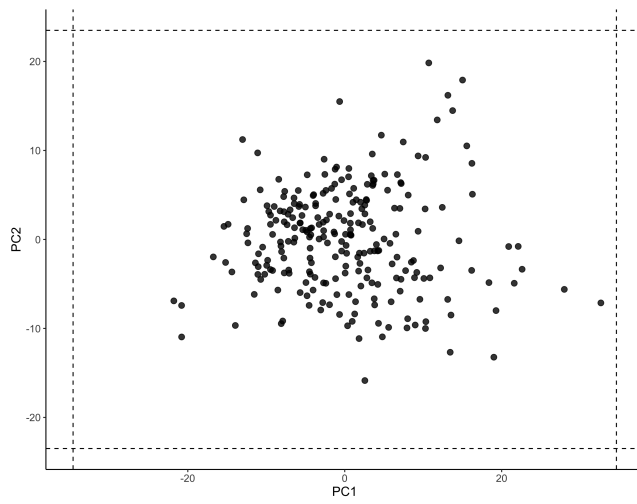

**QC figure 49:** Array-wide principal components, after first round of QC.



## 5 Definition of AUS1 and AUS2 strata

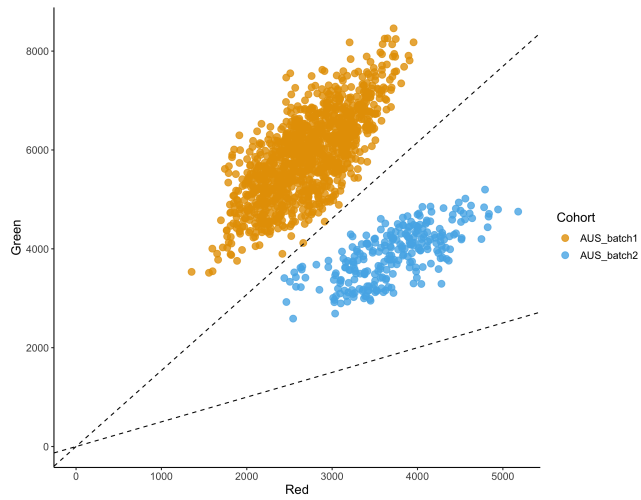

**QC figure 50:** Median red vs. median green signal in all Australian data, calculated in type I probes. AUS1 samples were defined based on an RG ratio  $<0.65$ , and AUS2 samples were defined based on an RG ratio  $>0.65$ .

## References

- [1] van Iterson, M. *et al.* MethylAid: visual and interactive quality control of large Illumina 450k datasets. *Bioinformatics* **30**, 23,435–3437 (2014).
- [2] Pidsley, R. *et al.* A data-driven approach to preprocessing Illumina 450K methylation array data. *BMC genomics* **14**, 293 (2013).
- [3] Aryee, M. J. *et al.* Minfi: a flexible and comprehensive Bioconductor package for the analysis of Infinium DNA methylation microarrays. *Bioinformatics* **30**, 10,1363–1369 (2014).
- [4] Zhang, Q. *et al.* Improved precision of epigenetic clock estimates across tissues and its implication for biological ageing. *Genome Medicine* **11**, 54 (2019).
